# Supplementary material for: High performance cross-linked anion exchange membrane based on aryl-ether free polymer backbones for anion exchange membrane fuel cell application
Source: Royal Society of Chemistry journal article supplement (doi:10.1039/d0se00502a), 2020-01-01
Supplement: d0se00502a1.pdf [file d0se00502a1.pdf]

## Supporting information

### High performance cross-linked anion exchange membrane based on the aryl-ether free polymer backbones for anion exchange membrane fuel cell application

Xueqiang Gao,<sup>a,b</sup> HongMei Yu<sup>\*a</sup>, Feng Xie,<sup>a,b</sup> Jinkai Hao<sup>a</sup> and Zhigang Shao<sup>\*a</sup>

#### Captions of ESI

**Figure S1** The water uptake and swelling ratio of the cross-linked AEM: C2-CQASEBS, C4-CQASEBS and C6-CQASEBS at different temperature.

**Figure S2** The hydroxide ion conductivity of the cross-linked AEM: C2-CQASEBS, C4-CQASEBS and C6-CQASEBS at different temperature.

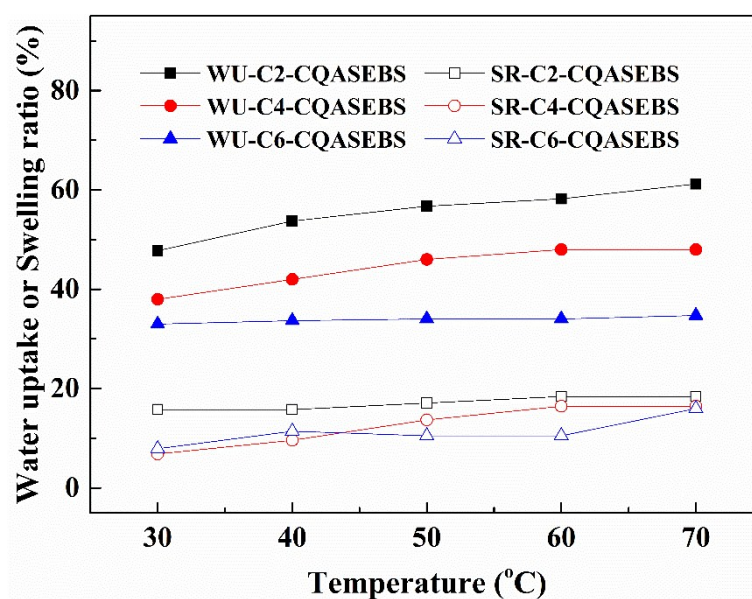

Figure S1 the water uptake and swelling ratio of the cross-linked AEM: C2-CQASEBS, C4-CQASEBS and C6-CQASEBS at different temperature.

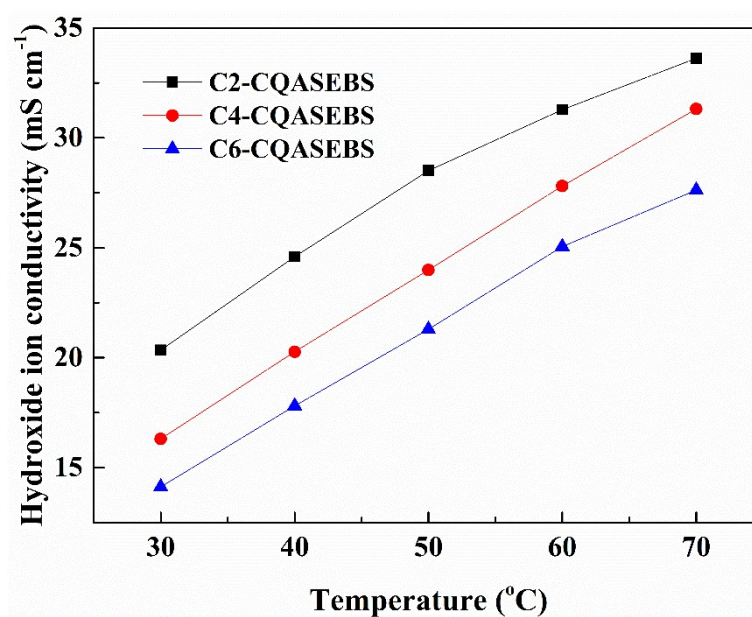

Figure S2 the hydroxide ion conductivity of the cross-linked AEM: C2-CQASEBS, C4-CQASEBS and C6-CQASEBS at different temperature.
